# Supplementary material for: Positive Selection during the Evolution of the Blood Coagulation Factors in the Context of Their Disease-Causing Mutations
Source: PubMed Central journal article supplement (PMC4209140; doi:10.1093/molbev/msu248), 2014-08-25
Supplement: supp_msu248_Positive-Selection_supplementary_material_S3b_S3c.pdf [file supp_msu248_Positive-Selection_supplementary_material_S3b_S3c.pdf]

# (b) FIX

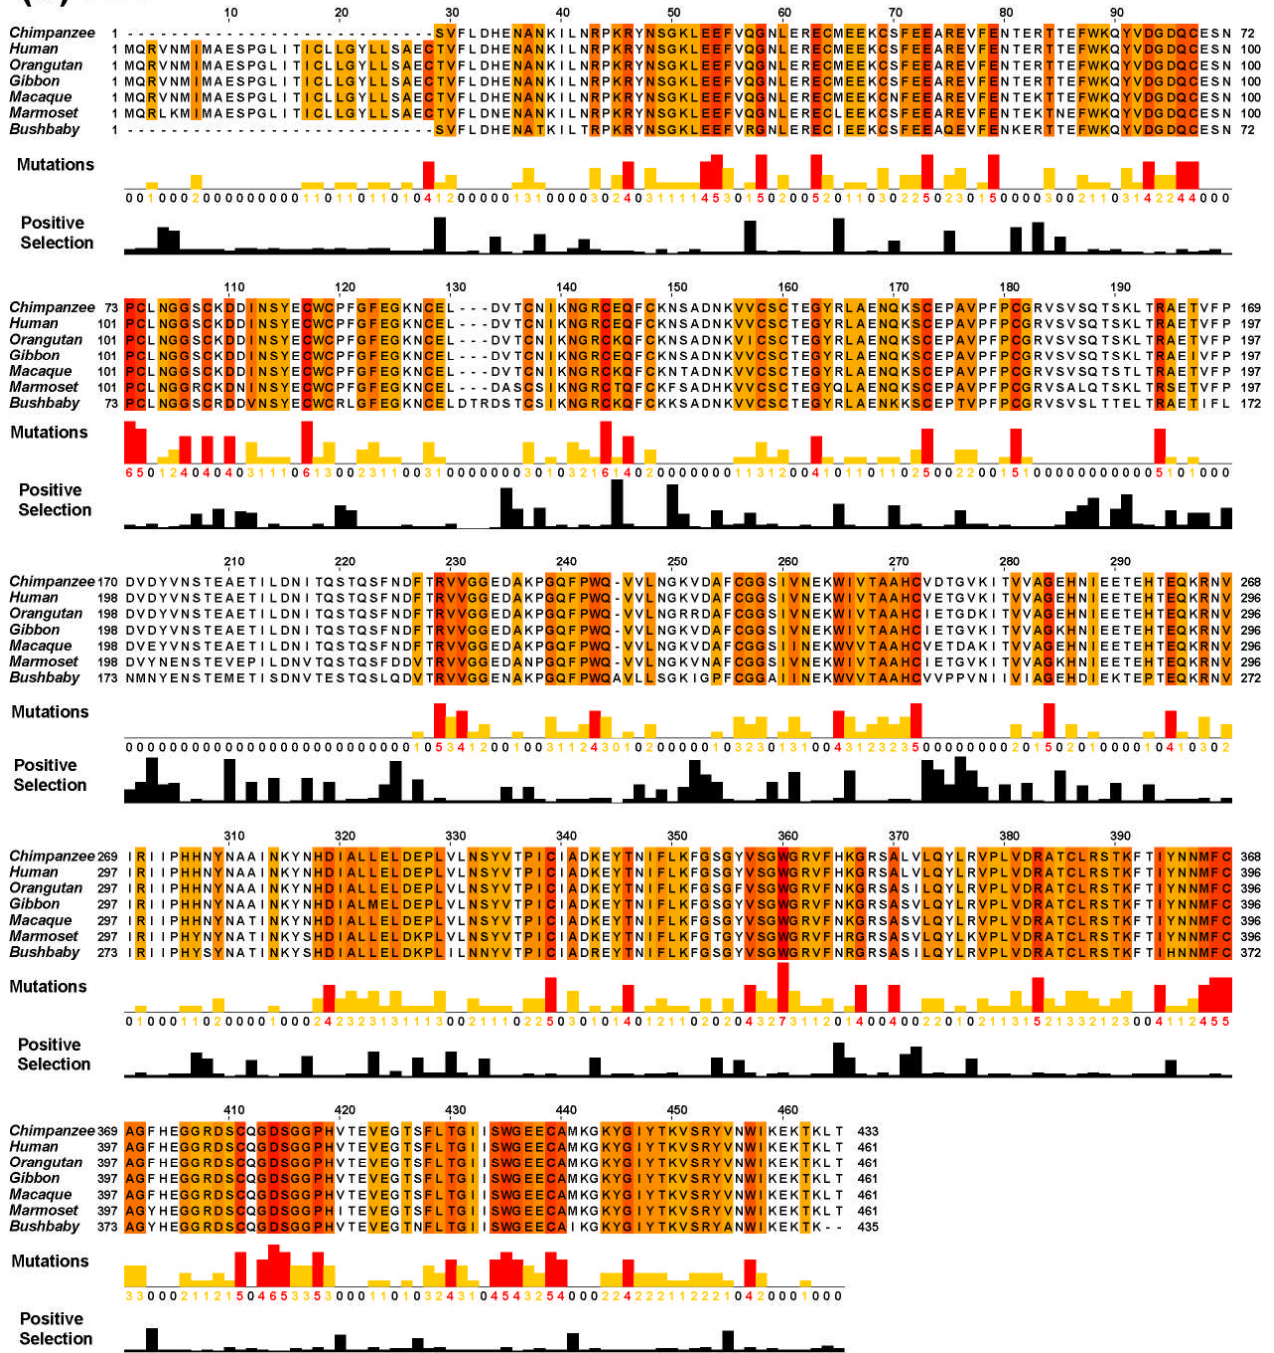

FIGURE S3(b)

(c) FXI

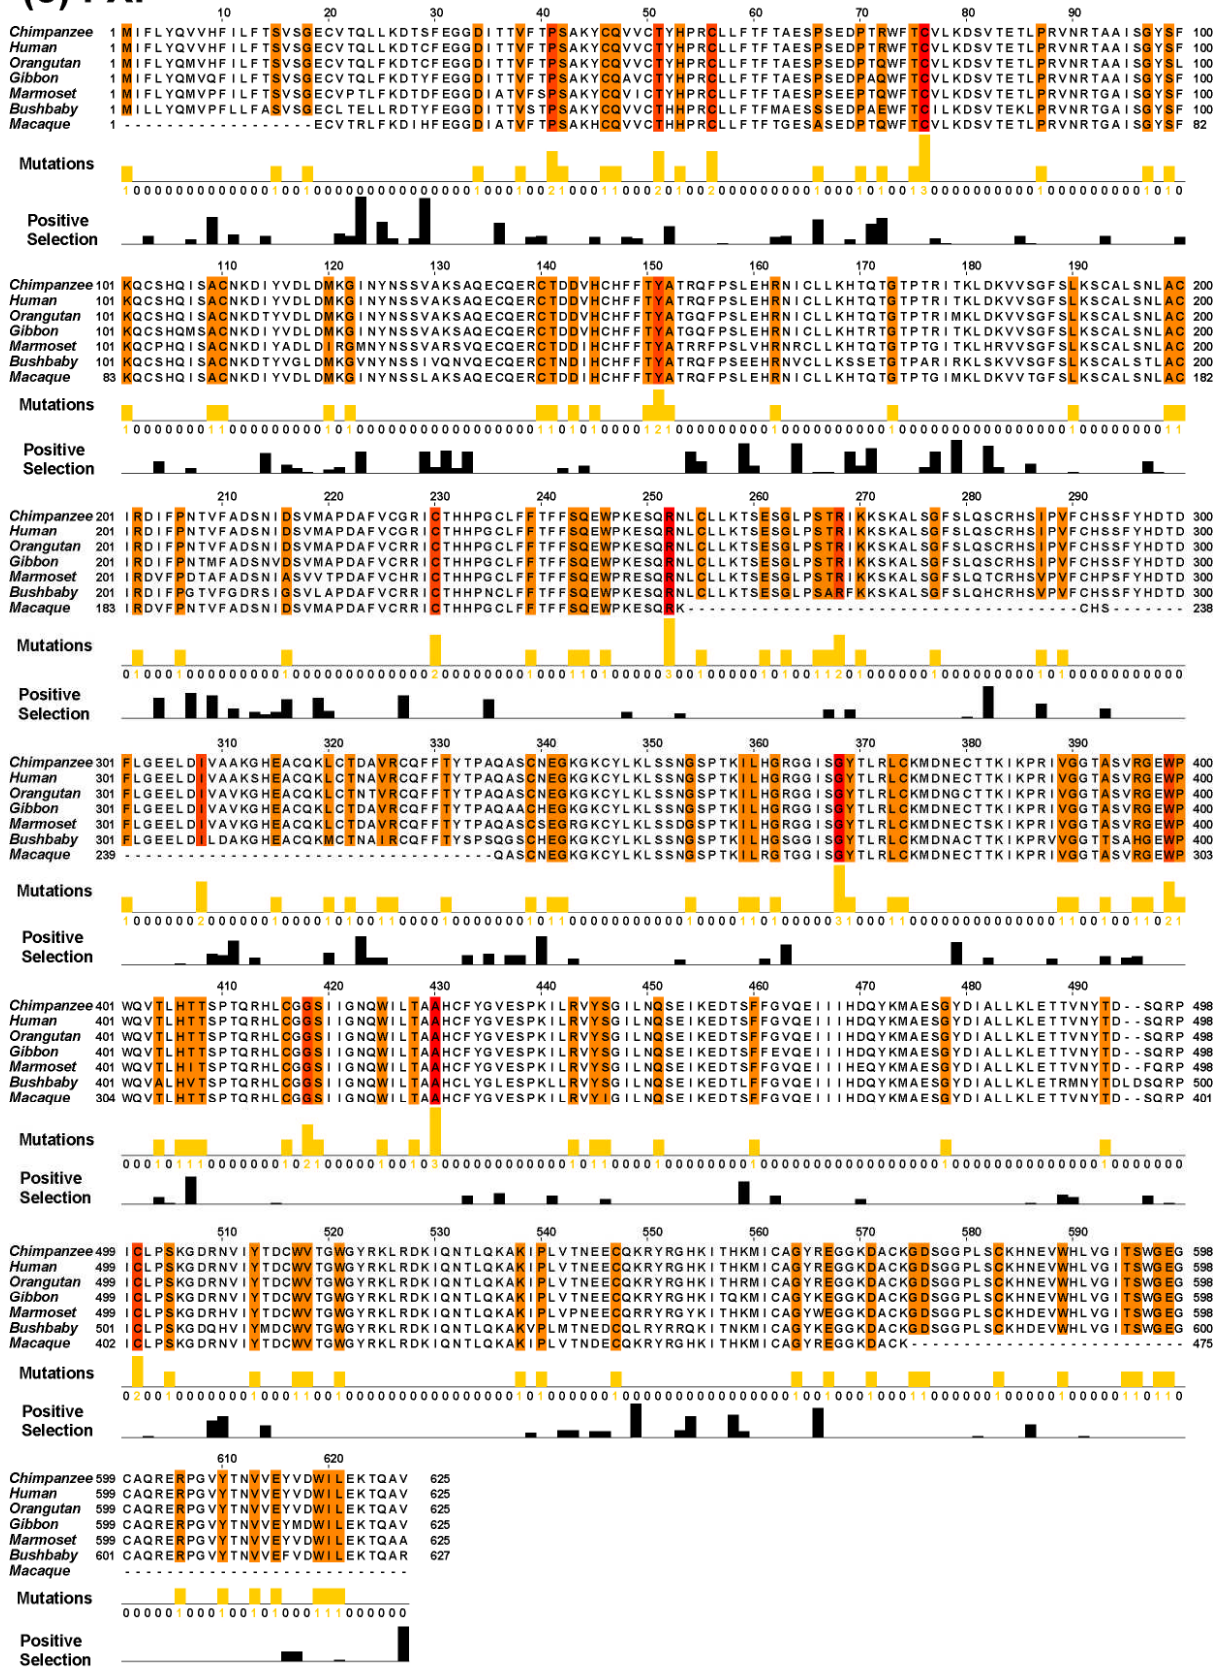

FIGURE S3(c)
