# Supplementary material for: Positive Selection during the Evolution of the Blood Coagulation Factors in the Context of Their Disease-Causing Mutations
Source: PubMed Central journal article supplement (PMC4209140; doi:10.1093/molbev/msu248), 2014-08-25
Supplement: supp_msu248_Positive-Selection_supplementary_material_Tables_S1_S2.pdf [file supp_msu248_Positive-Selection_supplementary_material_Tables_S1_S2.pdf]

# SUPPLEMENTARY MATERIAL

**Table S1: Presence and absence of the 14 coagulation genes in each of the 47 genomes used in this study.**

| Clades         | Scientific name                   | Common name  | FGA | FGB | FGG | F2        | F3  | F5  | F7  | F8        | F9        | F10 | F11 | F12       | F13A | F13B |
|----------------|-----------------------------------|--------------|-----|-----|-----|-----------|-----|-----|-----|-----------|-----------|-----|-----|-----------|------|------|
| Primates       | <i>Callithrix jacchus</i>         | Marmoset     | Yes | Yes | Yes | Yes       | Yes | Yes | Yes | Yes       | Yes       | Yes | Yes | Yes       | Yes  | Yes  |
| Primates       | <i>Homo sapiens</i>               | Human        | Yes | Yes | Yes | Yes       | Yes | Yes | Yes | Yes       | Yes       | Yes | Yes | Yes       | Yes  | Yes  |
| Primates       | <i>Macaca mulatta</i>             | Macaque      | Yes | Yes | Yes | Yes       | Yes | Yes | Yes | Yes       | Yes       | Yes | Yes | Yes       | Yes  | Yes  |
| Primates       | <i>Nomascus leucogenys</i>        | Gibbon       | Yes | Yes | Yes | Yes       | Yes | Yes | Yes | Yes       | Yes       | Yes | Yes | Yes       | Yes  | Yes  |
| Primates       | <i>Otolemur garnettii</i>         | Bushbaby     | Yes | Yes | Yes | Yes       | Yes | Yes | Yes | Yes       | Yes       | Yes | Yes | Yes       | Yes  | Yes  |
| Primates       | <i>Pongo abelii</i>               | Orangutan    | Yes | Yes | Yes | Yes       | Yes | Yes | Yes | Yes       | Yes       | Yes | Yes | Yes       | Yes  | Yes  |
| Primates       | <i>Pan troglodytes</i>            | Chimpanzee   | Yes | Yes | Yes | Yes       | Yes | Yes | Yes | Yes       | Yes       | Yes | Yes | Yes       | Yes  | Yes  |
| Glires         | <i>Cavia porcellus</i>            | Guinea Pig   | Yes | Yes | Yes | Yes       | Yes | Yes | Yes | Yes       | Yes       | Yes | Yes | Yes       | Yes  | Yes  |
| Glires         | <i>Dipodomys ordii</i>            | Kangaroo rat | Yes | Yes | Yes | Yes       | Yes | Yes | Yes | Yes       | Yes       | Yes | Yes | Yes       | Yes  | Yes  |
| Glires         | <i>Mus musculus</i>               | Mouse        | Yes | Yes | Yes | Yes       | Yes | Yes | Yes | Yes       | Yes       | Yes | Yes | Yes       | Yes  | Yes  |
| Glires         | <i>Oryctolagus cuniculus</i>      | Rabbit       | Yes | Yes | Yes | Yes       | Yes | Yes | Yes | Yes       | Yes       | Yes | Yes | Yes       | Yes  | Yes  |
| Glires         | <i>Ochotona princeps</i>          | Pika         | Yes | Yes | Yes | Yes       | Yes | Yes | Yes | Yes       | Yes       | Yes | Yes | Yes       | Yes  | Yes  |
| Glires         | <i>Rattus norvegicus</i>          | Rat          | Yes | Yes | Yes | Yes       | Yes | Yes | Yes | Yes       | Yes       | Yes | Yes | Yes       | Yes  | Yes  |
| Glires         | <i>Ictidomys tridecemlineatus</i> | Squirrel     | Yes | Yes | Yes | Yes       | Yes | Yes | Yes | Yes       | Yes       | Yes | Yes | Yes       | Yes  | Yes  |
| Laurasiatheria | <i>Ailuropoda melanoleuca</i>     | Panda        | Yes | Yes | Yes | Yes       | Yes | Yes | Yes | Yes       | Yes       | Yes | Yes | Yes       | Yes  | Yes  |
| Laurasiatheria | <i>Bos taurus</i>                 | Cow          | Yes | Yes | Yes | Yes       | Yes | Yes | Yes | Yes       | Yes       | Yes | Yes | Yes       | Yes  | Yes  |
| Laurasiatheria | <i>Canis lupus familiaris</i>     | Dog          | Yes | Yes | Yes | Yes       | Yes | Yes | Yes | Yes       | Yes       | Yes | Yes | Yes       | Yes  | Yes  |
| Laurasiatheria | <i>Equus caballus</i>             | Horse        | Yes | Yes | Yes | Yes       | Yes | Yes | Yes | Yes       | Yes       | Yes | Yes | Yes       | Yes  | Yes  |
| Laurasiatheria | <i>Felis catus</i>                | Cat          | Yes | Yes | Yes | Yes       | Yes | Yes | Yes | Yes       | Yes       | Yes | Yes | Yes       | Yes  | Yes  |
| Laurasiatheria | <i>Mustela putorius furo</i>      | Ferret       | Yes | Yes | Yes | Yes       | Yes | Yes | Yes | Yes       | Yes       | Yes | Yes | Yes       | Yes  | Yes  |
| Laurasiatheria | <i>Sus scrofa</i>                 | Pig          | Yes | Yes | Yes | Yes       | Yes | Yes | Yes | Yes       | Yes       | Yes | Yes | Yes       | Yes  | Yes  |
| Atlantogenata  | <i>Choloepus hoffmanni</i>        | Sloth        | Yes | Yes | Yes | <b>No</b> | Yes | Yes | Yes | <b>No</b> | <b>No</b> | Yes | Yes | <b>No</b> | Yes  | Yes  |
| Atlantogenata  | <i>Dasyopus novemcinctus</i>      | Armadillo    | Yes | Yes | Yes | Yes       | Yes | Yes | Yes | Yes       | Yes       | Yes | Yes | Yes       | Yes  | Yes  |

|                      |                                 |                          |     |     |     |     |           |     |     |     |           |     |           |           |     |           |
|----------------------|---------------------------------|--------------------------|-----|-----|-----|-----|-----------|-----|-----|-----|-----------|-----|-----------|-----------|-----|-----------|
| <i>Atlantogenata</i> | <i>Echinops telfairi</i>        | Lesser hedgehog tenrec   | Yes | Yes | Yes | Yes | <b>No</b> | Yes | Yes | Yes | Yes       | Yes | Yes       | Yes       | Yes | Yes       |
| <i>Atlantogenata</i> | <i>Loxodonta africana</i>       | Elephant                 | Yes | Yes | Yes | Yes | Yes       | Yes | Yes | Yes | Yes       | Yes | Yes       | Yes       | Yes | Yes       |
| <i>Atlantogenata</i> | <i>Procavia capensis</i>        | Hyrax                    | Yes | Yes | Yes | Yes | Yes       | Yes | Yes | Yes | Yes       | Yes | Yes       | Yes       | Yes | Yes       |
| <i>Mammals</i>       | <i>Macropus eugenii</i>         | Wallaby                  | Yes | Yes | Yes | Yes | Yes       | Yes | Yes | Yes | Yes       | Yes | Yes       | Yes       | Yes | Yes       |
| <i>Mammals</i>       | <i>Monodelphis domestica</i>    | Opossum                  | Yes | Yes | Yes | Yes | Yes       | Yes | Yes | Yes | Yes       | Yes | Yes       | Yes       | Yes | Yes       |
| <i>Mammals</i>       | <i>Ornithorhynchus anatinus</i> | Platypus                 | Yes | Yes | Yes | Yes | Yes       | Yes | Yes | Yes | Yes       | Yes | <b>No</b> | Yes       | Yes | Yes       |
| <i>Mammals</i>       | <i>Sarcophilus harrisii</i>     | Tasmanian devil          | Yes | Yes | Yes | Yes | Yes       | Yes | Yes | Yes | Yes       | Yes | Yes       | Yes       | Yes | Yes       |
| <i>Sauropsida</i>    | <i>Anolis carolinensis</i>      | Anole lizard             | Yes | Yes | Yes | Yes | Yes       | Yes | Yes | Yes | Yes       | Yes | <b>No</b> | <b>No</b> | Yes | Yes       |
| <i>Sauropsida</i>    | <i>Anas platyrhynchos</i>       | Duck                     | Yes | Yes | Yes | Yes | Yes       | Yes | Yes | Yes | Yes       | Yes | <b>No</b> | <b>No</b> | Yes | Yes       |
| <i>Sauropsida</i>    | <i>Ficedula albicollis</i>      | Flycatcher               | Yes | Yes | Yes | Yes | Yes       | Yes | Yes | Yes | Yes       | Yes | <b>No</b> | <b>No</b> | Yes | Yes       |
| <i>Sauropsida</i>    | <i>Gallus gallus</i>            | Chicken                  | Yes | Yes | Yes | Yes | Yes       | Yes | Yes | Yes | Yes       | Yes | <b>No</b> | <b>No</b> | Yes | Yes       |
| <i>Sauropsida</i>    | <i>Meleagris gallopavo</i>      | Turkey                   | Yes | Yes | Yes | Yes | Yes       | Yes | Yes | Yes | Yes       | Yes | <b>No</b> | <b>No</b> | Yes | Yes       |
| <i>Sauropsida</i>    | <i>Pelodiscus sinensis</i>      | Chinese softshell turtle | Yes | Yes | Yes | Yes | Yes       | Yes | Yes | Yes | Yes       | Yes | <b>No</b> | <b>No</b> | Yes | Yes       |
| <i>Sauropsida</i>    | <i>Taeniopygia guttata</i>      | Zebra Finch              | Yes | Yes | Yes | Yes | Yes       | Yes | Yes | Yes | Yes       | Yes | <b>No</b> | <b>No</b> | Yes | Yes       |
| <i>Other</i>         | <i>Latimeria chalumnae</i>      | Coelacanth               | Yes | Yes | Yes | Yes | Yes       | Yes | Yes | Yes | Yes       | Yes | <b>No</b> | Yes       | Yes | Yes       |
| <i>Tetrapoda</i>     | <i>Xenopus tropicalis</i>       | Xenopus                  | Yes | Yes | Yes | Yes | Yes       | Yes | Yes | Yes | Yes       | Yes | <b>No</b> | Yes       | Yes | Yes       |
| <i>Fishes</i>        | <i>Danio rerio</i>              | Zebrafish                | Yes | Yes | Yes | Yes | Yes       | Yes | Yes | Yes | Yes       | Yes | <b>No</b> | <b>No</b> | Yes | <b>No</b> |
| <i>Fishes</i>        | <i>Gasterosteus aculeatus</i>   | Stickleback              | Yes | Yes | Yes | Yes | Yes       | Yes | Yes | Yes | Yes       | Yes | <b>No</b> | <b>No</b> | Yes | <b>No</b> |
| <i>Fishes</i>        | <i>Gadus morhua</i>             | Cod                      | Yes | Yes | Yes | Yes | Yes       | Yes | Yes | Yes | Yes       | Yes | <b>No</b> | <b>No</b> | Yes | <b>No</b> |
| <i>Fishes</i>        | <i>Oreochromis niloticus</i>    | Tilapia                  | Yes | Yes | Yes | Yes | Yes       | Yes | Yes | Yes | Yes       | Yes | <b>No</b> | <b>No</b> | Yes | <b>No</b> |
| <i>Fishes</i>        | <i>Oryzias latipes</i>          | Medaka                   | Yes | Yes | Yes | Yes | Yes       | Yes | Yes | Yes | <b>No</b> | Yes | <b>No</b> | <b>No</b> | Yes | <b>No</b> |
| <i>Fishes</i>        | <i>Tetraodon nigroviridis</i>   | Tetraodon                | Yes | Yes | Yes | Yes | Yes       | Yes | Yes | Yes | Yes       | Yes | <b>No</b> | <b>No</b> | Yes | <b>No</b> |
| <i>Fishes</i>        | <i>Takifugu rubripes</i>        | Fugu                     | Yes | Yes | Yes | Yes | Yes       | Yes | Yes | Yes | Yes       | Yes | <b>No</b> | <b>No</b> | Yes | <b>No</b> |
| <i>Fishes</i>        | <i>Xiphophorus maculatus</i>    | Platyfish                | Yes | Yes | Yes | Yes | Yes       | Yes | Yes | Yes | Yes       | Yes | <b>No</b> | <b>No</b> | Yes | <b>No</b> |

**Table S2a: Positively selected genes of the coagulation cascade within different groups of species as calculated with the site model in this study.**

|             | <b>Vertebrates</b> | <b>Fishes</b> | <b>Sauropsida</b> | <b>Mammals</b> | <b>Laurasiatheria</b> | <b>Glires</b> | <b>Primates</b> |
|-------------|--------------------|---------------|-------------------|----------------|-----------------------|---------------|-----------------|
| <i>FGA</i>  | No                 | No            | No                | <b>Yes</b>     | <b>Yes</b>            | No            | No              |
| <i>FGB</i>  | No                 | No            | No                | No             | No                    | No            | <b>Yes</b>      |
| <i>FGG</i>  | No                 | No            | No                | No             | No                    | No            | No              |
| <i>F2</i>   | <b>Yes</b>         | No            | No                | No             | No                    | No            | No              |
| <i>F3</i>   | No                 | No            | <b>Yes</b>        | <b>Yes</b>     | No                    | No            | No              |
| <i>F5</i>   | <b>Yes</b>         | No            | No                | <b>Yes</b>     | No                    | No            | <b>Yes</b>      |
| <i>F7</i>   | <b>Yes</b>         | No            | No                | No             | No                    | No            | No              |
| <i>F8</i>   | No                 | No            | No                | <b>Yes</b>     | No                    | No            | <b>Yes</b>      |
| <i>F9</i>   | No                 | No            | No                | <b>Yes</b>     | No                    | No            | No              |
| <i>F10</i>  | <b>Yes</b>         | No            | No                | No             | No                    | No            | No              |
| <i>F11</i>  | No                 | No            | No                | No             | No                    | No            | No              |
| <i>F12</i>  | No                 | No            | No                | No             | No                    | No            | No              |
| <i>F13A</i> | <b>Yes</b>         | No            | No                | No             | No                    | No            | No              |
| <i>F13B</i> | No                 | No            | No                | No             | <b>Yes</b>            | No            | No              |

**Table S2b: Positively selected genes of the coagulation cascade in different branches of the taxonomic tree of vertebrates as calculated in the branch-site model in this study. Within brackets () are given the results from the Selectome Database for comparison. (-) means that the results for the gene family are not available in Selectome.**

| <b>Gene</b> | <b>Codons analysed</b> | <b>Actinopterygii</b>     | <b>Sarcopterygii</b>      | <b>Tetrapoda</b>          | <b>Amniota</b>            | <b>Sauropsida</b>         | <b>Mammals</b>            | <b>Theria</b>     | <b>Eutheria</b>           |
|-------------|------------------------|---------------------------|---------------------------|---------------------------|---------------------------|---------------------------|---------------------------|-------------------|---------------------------|
| <i>FGA</i>  | 135                    | <b>Yes</b> (No)           | <b>Yes</b> (No)           | No (No)                   | No ( <b>Yes</b> )         | No (No)                   | No (No)                   | No (No)           | No (No)                   |
| <i>FGB</i>  | 315                    | <b>Yes</b> ( <b>Yes</b> ) | <b>Yes</b> ( <b>Yes</b> ) | <b>Yes</b> (No)           | <b>Yes</b> ( <b>Yes</b> ) | <b>Yes</b> (No)           | <b>Yes</b> ( <b>Yes</b> ) | No ( <b>Yes</b> ) | No (No)                   |
| <i>FGG</i>  | 299                    | No (No)                   | No (No)                   | No (No)                   | No (No)                   | No (No)                   | No ( <b>Yes</b> )         | No (No)           | No (No)                   |
| <i>F2</i>   | 391                    | <b>Yes</b> (No)           | <b>Yes</b> (No)           | <b>Yes</b> ( <b>Yes</b> ) | <b>Yes</b> ( <b>Yes</b> ) | No (No)                   | <b>Yes</b> (No)           | No (-)            | <b>Yes</b> ( <b>Yes</b> ) |
| <i>F3</i>   | 122                    | No (No)                   | No (No)                   | No (No)                   | No (No)                   | No (No)                   | No (No)                   | No (No)           | No (No)                   |
| <i>F5</i>   | 488                    | <b>Yes</b> (-)            | <b>Yes</b> (-)            | <b>Yes</b> (-)            | <b>Yes</b> (-)            | No (-)                    | No (-)                    | No (-)            | No (-)                    |
| <i>F7</i>   | 126                    | (-) ( <b>Yes</b> )        | (-) ( <b>Yes</b> )        | No (No)                   | No (No)                   | No (No)                   | No (No)                   | No (No)           | No (No)                   |
| <i>F8</i>   | 701                    | <b>Yes</b> (-)            | <b>Yes</b> (-)            | <b>Yes</b> (-)            | <b>Yes</b> (-)            | <b>Yes</b> (-)            | <b>Yes</b> (-)            | No (-)            | No (-)                    |
| <i>F9</i>   | 218                    | <b>Yes</b> ( <b>Yes</b> ) | <b>Yes</b> ( <b>Yes</b> ) | No ( <b>Yes</b> )         | <b>Yes</b> ( <b>Yes</b> ) | <b>Yes</b> ( <b>Yes</b> ) | No (No)                   | No (No)           | <b>Yes</b> ( <b>Yes</b> ) |
| <i>F10</i>  | 197                    | No ( <b>Yes</b> )         | No ( <b>Yes</b> )         | No ( <b>Yes</b> )         | <b>Yes</b> ( <b>Yes</b> ) | No ( <b>Yes</b> )         | No ( <b>Yes</b> )         | No (No)           | No (No)                   |
| <i>F11</i>  | 152                    | No (-)                    | No (-)                    | No (-)                    | No (-)                    | No (-)                    | No (-)                    | No (-)            | No (-)                    |
| <i>F12</i>  | 306                    | No (-)                    | No (-)                    | No (-)                    | <b>Yes</b> (-)            | No (-)                    | <b>Yes</b> (-)            | No (-)            | No (-)                    |
| <i>F13A</i> | 388                    | <b>Yes</b> ( <b>Yes</b> ) | <b>Yes</b> ( <b>Yes</b> ) | <b>Yes</b> ( <b>Yes</b> ) | <b>Yes</b> (No)           | No (No)                   | No (No)                   | No ( <b>Yes</b> ) | No (No)                   |
| <i>F13B</i> | 245                    | (-) (-)                   | (-) (-)                   | No (-)                    | <b>Yes</b> (-)            | No (-)                    | No (-)                    | No (-)            | No (-)                    |

## Figure Legends

**Supplementary Figure S1.** Schematic representation of the workflow of this study. The programs (Methods) and the order in which they were employed to provide the multiple sequence alignments of sufficient quality and the phylogenetic trees is shown. This procedure enabled the calculation of selective pressures using CodeML.

**Supplementary Figure S2.** The probabilities of negative, neutral and positive selection were plotted against the amino acid position for the other 11 coagulation genes of the 14 across the Primates. This extends Figure 4 in the main text in which only the three genes for FIX, FVIII and FXI are shown. The probability values were obtained from CodeML analyses of the seven primate sequences (grey, negative selection; yellow, neutral selection; green, positive selection).

**Supplementary Figure S3.** Summary of the seven *Primates* sequences to show the degree of positive selection during evolution and the pathogenic mutations at each site for (a) FVIII, (b) FIX, and (c) FXI. The point mutations in the coding regions were obtained from the disease-causing databases for (a) FVIII, (b) FIX, and (c) FXI. Red and orange denote  $\geq 4$  mutations and 1-3 mutations respectively. The probabilities of positive selection were taken from the CodeML runs for the seven primate sequences. Because FVIII is a large protein with 2351 residues, the figure was divided into three parts to accommodate the sequence length.

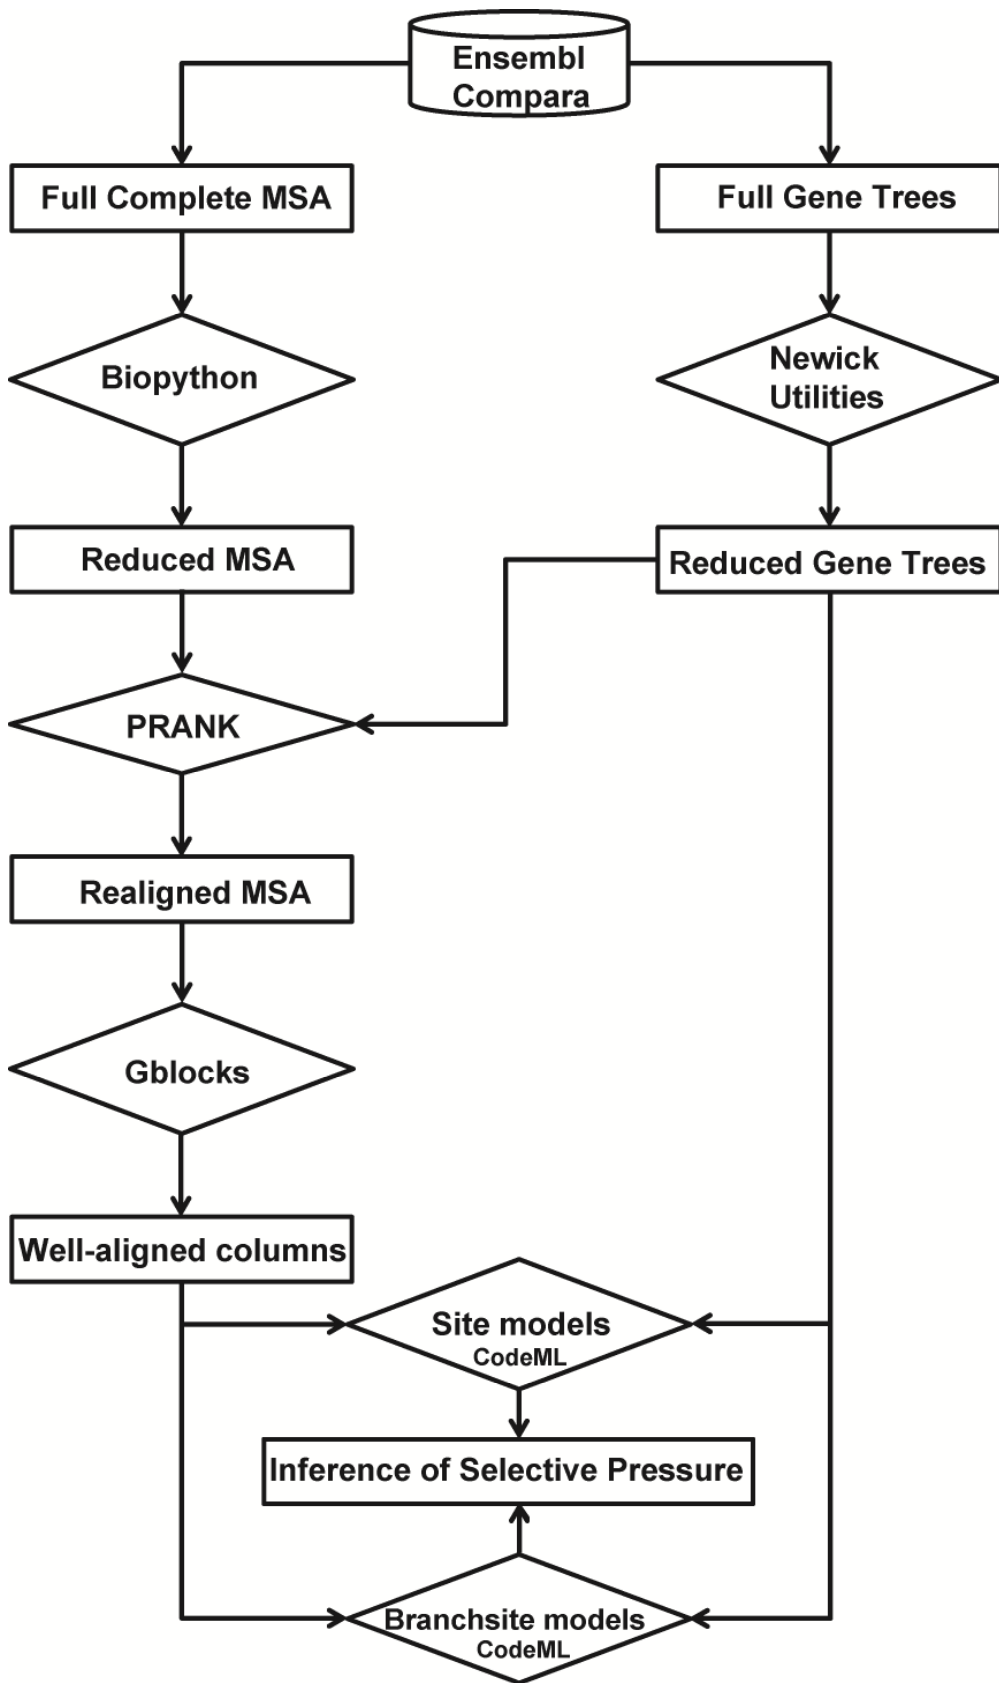

**FIGURE S1**

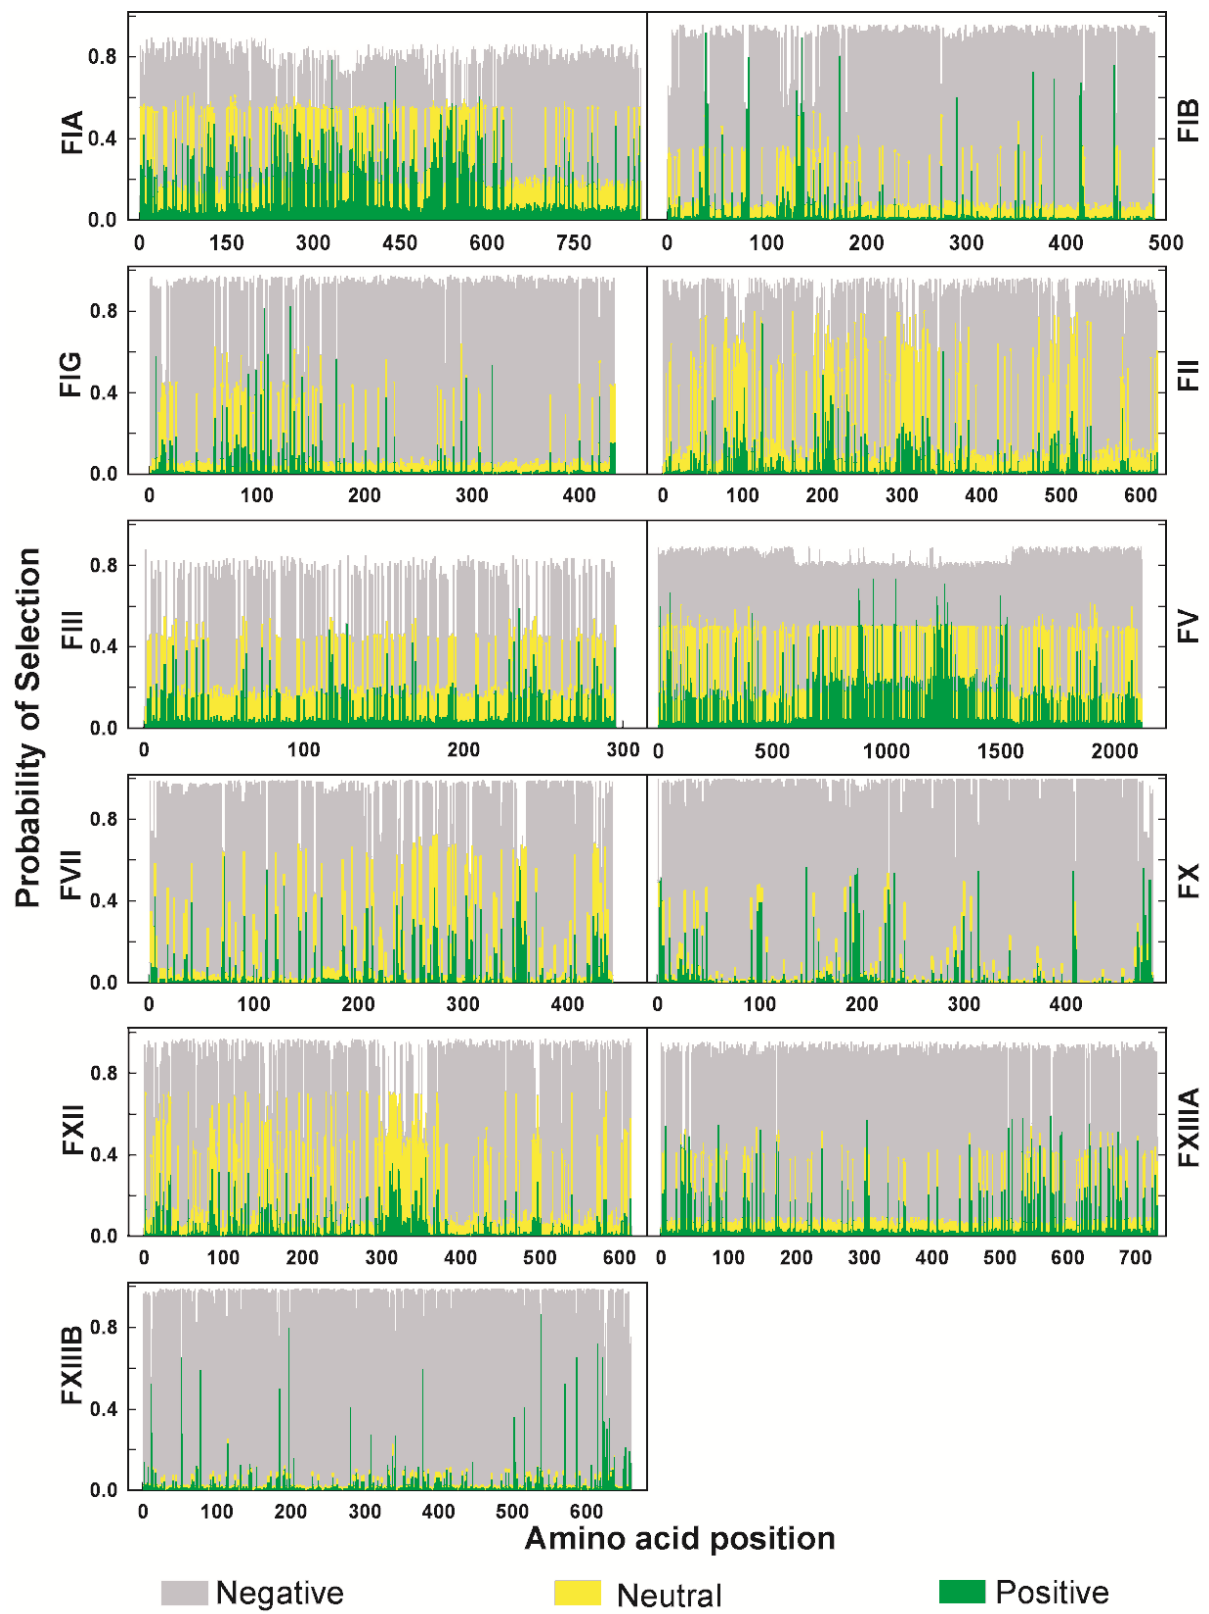

**FIGURE S2**
